# Supplementary material for: In Vitro CRISPR/Cas9 System for Efficient Targeted DNA Editing
Source: PubMed Central journal article supplement — mBio. 2015 Nov 10;6(6):e01714-15. doi: 10.1128/mBio.01714-15 (PMC4659471; doi:10.1128/mbio.01714-15), 2015-11-10
Supplement: mbo006152558sf2.pdf [file mbo006152558sf2.pdf]

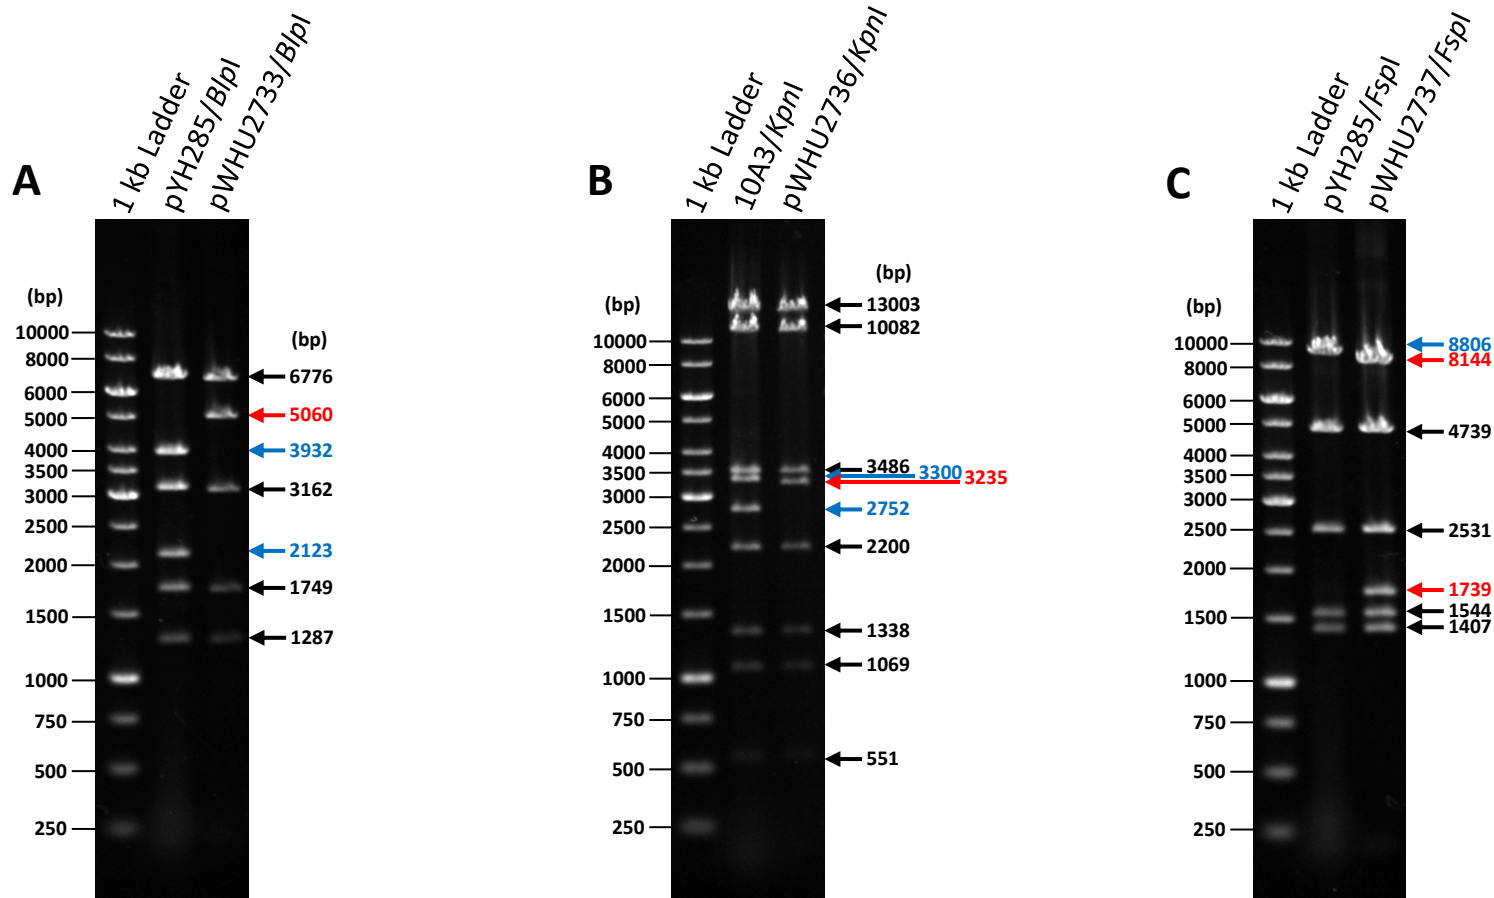

**FIG S2** Confirmation of recombinants by restriction mapping. (A) Confirmation of in-frame deletion of *rkd* in plasmid pYH285 by *Blpl* restriction digestion. (B) Confirmation of in-frame deletion of *homE* in cosmid 10A3 by *KpnI* restriction digestion. (C) Confirmation of insertion of *bla* in plasmid pWHU285 by *FspI* restriction digestion. The DNA bands of size changed before and after deletion/insertion are indicated by blue and red arrows, respectively.
