# Supplementary material for: In Vitro CRISPR/Cas9 System for Efficient Targeted DNA Editing
Source: PubMed Central journal article supplement — mBio. 2015 Nov 10;6(6):e01714-15. doi: 10.1128/mBio.01714-15 (PMC4659471; doi:10.1128/mbio.01714-15), 2015-11-10
Supplement: mbo006152558st1.pdf [file mbo006152558st1.pdf]

**Table S1. Plasmids used in this study**

| Plasmid   | Description                                                                            | Reference               |
|-----------|----------------------------------------------------------------------------------------|-------------------------|
| pUC18     | Vector for general cloning                                                             | (Sambrook et al., 1989) |
| pET28a(+) | Protein expression vector                                                              | Invitrogen              |
| 10A3      | A cosmid from <i>S. clavuligerus</i> ATCC 27064 genomic library                        | (Huang et al., 2011)    |
| pYH285    | A heterologous expression construct containing entire RK-682 biosynthetic gene cluster | (Sun et al., 2010)      |
| pWHU2733  | <i>rkD</i> in-frame deletion construct based on pYH285                                 | This study              |
| pWHU2736  | <i>homE</i> in-frame deletion construct based on cosmid 10A3                           | This study              |
| pWHU2737  | <i>bla</i> insertion construct based on pYH285                                         | This study              |
| pWHU2739  | Construct for Cas9 expression                                                          | This study              |

**References**

- Huang S, Zhao Y, Qin Z, Wang X, Onega M, Chen L, He J, Yu Y, Deng H. 2011. Identification and heterologous expression of the biosynthetic gene cluster for holomycin produced by *Streptomyces clavuligerus*. *Process Biochemistry* **46**:811-816.
- Sambrook J, Fritsch EF, Maniatis T, 1989, *Molecular Cloning: A Laboratory Manual* (Cold Spring Harbor Lab. Press, Plainview, NY), 2<sup>nd</sup> Ed.
- Sun Y, Hahn F, Demydchuk Y, Chettle J, Tosin M, Osada H, Leadlay PF. 2010. In vitro reconstruction of tetronate RK-682 biosynthesis. *Nature chemical biology* **6**:99-101.
