# Supplementary material for: In Vitro CRISPR/Cas9 System for Efficient Targeted DNA Editing
Source: PubMed Central journal article supplement — mBio. 2015 Nov 10;6(6):e01714-15. doi: 10.1128/mBio.01714-15 (PMC4659471; doi:10.1128/mbio.01714-15), 2015-11-10
Supplement: mbo006152558st2.pdf [file mbo006152558st2.pdf]

**Table S2. Strains used in this study**

| Strain                         | Characteristic                                                              | Reference             |
|--------------------------------|-----------------------------------------------------------------------------|-----------------------|
| <b><i>Escherichia coli</i></b> |                                                                             |                       |
| DH10B                          | Host for general cloning                                                    | Invitrogen            |
| ET12567/pUZ8002                | Donor strain for conjugation between <i>E. coli</i> and <i>Streptomyces</i> | Invitrogen            |
| <b><i>Streptomyces</i></b>     |                                                                             |                       |
| <i>S. lividans</i> TK24        | RK-682 heterologous expression host                                         | (Hopwood et al, 1983) |
| TK24::pYH285                   | TK24 integrated with a heterologous expression construct pYH285             | This study            |
| TK24::pWHU2733                 | TK24 integrated with a <i>rkD</i> in-frame deletion construct pWHU2733      | This study            |
| <i>S. albus</i> J1074          | Holomycin heterologous expression host                                      | (Chater et al, 1976)  |
| J1074::10A3                    | J1074 integrated with a construct 10A3                                      | (Huang et al., 2010)  |
| J1074::pWHU2736                | J1074 integrated with a <i>homE</i> in-frame deletion construct pWHU2736    | This study            |

**References**

- Chater KF, Wilde LC. 1976. Restriction of a bacteriophage of *Streptomyces albus* G involving endonuclease Sall. *Journal of bacteriology* **128**(2):644-50.
- Hopwood DA, Kieser T, Wright HM, Bibb MJ. 1983. Plasmids, recombination and chromosome mapping in *Streptomyces lividans* 66. *Journal of general microbiology*. **129**:2257-2269.
