# Supplementary material for: In Vitro CRISPR/Cas9 System for Efficient Targeted DNA Editing
Source: PubMed Central journal article supplement — mBio. 2015 Nov 10;6(6):e01714-15. doi: 10.1128/mBio.01714-15 (PMC4659471; doi:10.1128/mbio.01714-15), 2015-11-10
Supplement: mbo006152558st3.pdf [file mbo006152558st3.pdf]

**Table S3. Oligonucleotide primers used in this study**

| Primer        | Oligonucleotide sequences (5' to 3')                                                    |
|---------------|-----------------------------------------------------------------------------------------|
| sgRNA/A*      | AAAAGCACCGACTCGGTGCCACTTTTTCAAGTTGAT<br>AACGGACTAGCCTTATTTAACTTGCTATTTCTAGCTC<br>TAAAAC |
| sgRNA18-1/S   | GATCACTAATACGACTCACTATAGGCCAACGCGCGG<br>GGAGAGGGTTTTAGAGCTAGAAA                         |
| sgRNA18-2/S   | GATCACTAATACGACTCACTATAGGCCGATTCATTAAT<br>GCAGCGTTTTAGAGCTAGAAA                         |
| sgRNA18-3/S   | GATCACTAATACGACTCACTATAGCTTGTCTGTAAGC<br>GGATGCGTTTTAGAGCTAGAAA                         |
| sgRNA18-4/S   | GATCACTAATACGACTCACTATAGACAAGCTGTGACC<br>GTCTCCGTTTTAGAGCTAGAAA                         |
| sgRNArkD-1/S  | GATCACTAATACGACTCACTATAGACCAGGTGGGCG<br>ACGGGGGGTTTTAGAGCTAGAAA                         |
| sgRNArkD-2/S  | GATCACTAATACGACTCACTATAGCCGGACTTGATCC<br>ACTTGCGTTTTAGAGCTAGAAA                         |
| sgRNA285/S    | GATCACTAATACGACTCACTATAGCTCACCGACGACC<br>CGCGCAGTTTTAGAGCTAGAAA                         |
| sgRNAhomE-1/S | GATCACTAATACGACTCACTATAGGCCACGTCGCCG<br>TCGCTCCGTTTTAGAGCTAGAAA                         |
| sgRNAhomE-2/S | GATCACTAATACGACTCACTATAGA AACTCGAAGAAGA<br>AGTGCGTTTTAGAGCTAGAAA                        |
| 28+cas9-up    | CCGCGCGGCAGCCATATGGATAAGAAATACTCAAT                                                     |
| 28+cas9-dn    | ACGGAGCTCGAATTCTTAGTCACCTCCTAGCTGAC                                                     |

|         |                      |
|---------|----------------------|
| rkDCK1  | CTGCCGCCGTACGTCTTCGA |
| rkDCK2  | CAGCCCCTGTTGAACTCGC  |
| 285CK1  | CGGCTAAAAAAGTCATGGCT |
| 285CK2  | CAACGGCGTCAGCCGGGCAG |
| homECK1 | GGTGCTGGAGCGGAGGTTGG |
| homECK2 | GCAGCACCAGCAGGATGTCG |
| bla-up  | ACGAAAGGGCCTCGTGATAC |
| bla-dn  | CAATCTAAAGTATATATGAG |

---

\* sgRNA/A is a common bottom oligo for transcription template DNA. T7 promoter sequence is presented in green, the guide sequence for the refitment of transcription template DNA in red and the sequence of sgRNAx/S in blue is the overlapping region with sgRNA/A.
